# Supplementary material
Source: PubMed Central journal article supplement (PMC6171796)
Supplement: jciinsight-3-121630-s164.pdf [file jciinsight-3-121630-s164.pdf]

Supplementary Table 1

**MicroRNAs involved in cartilage-protective mechanisms**

| MicroRNA                   | Tissue              | Target Gene          | Role of microRNA                                                        | Reference |
|----------------------------|---------------------|----------------------|-------------------------------------------------------------------------|-----------|
| <b>miR-140</b>             | Articular cartilage | ADAMTS-5,<br>IGFBP-5 | Cartilage development<br>and homeostasis                                | [1-3]     |
| <b>miR-30a</b>             | Articular cartilage | ADAMTS-5             | Cartilage homeostasis                                                   | [4]       |
| <b>miR-9</b>               | Articular cartilage | NF-Kb                | Chondrocyte proliferation,<br>anti-apoptosis                            | [5]       |
|                            |                     | MMP-13               | Increases Type II<br>Collagen                                           | [6]       |
| <b>miR-502-5p</b>          | Articular cartilage | TRAF2                | Anti-apoptotic, anti-<br>catabolic, anti-<br>inflammatory               | [7]       |
| <b>miR-145</b>             | Articular cartilage | TNFRSF11B            | Regulates chondrocyte<br>proliferation and fibrosis                     | [8]       |
| <b>miR-146a</b>            | Articular cartilage | TRAF6                | Chondrocyte proliferation,<br>anti-apoptosis. Inhibits<br>NF-κB pathway | [9]       |
| <b>miR-26a-5p</b>          | Articular cartilage | iNOS                 | Cartilage homeostasis                                                   | [10]      |
| <b>miR26a,<br/>miR-26b</b> | Articular cartilage | KPNA3                | Promotes NF-κB p65<br>translocation                                     | [11]      |
| <b>miR-105</b>             | Articular cartilage | Runx2                | Inhibits Runx2 activation<br>and ADAMTS expression                      | [12]      |
| <b>miR-320a</b>            | Articular cartilage | BMI-1, RUNX2         | Chondrocyte viability                                                   | [13]      |
|                            |                     | MMP-13               | Chondrogenesis                                                          | [14]      |
| <b>miR-411</b>             | Articular cartilage | MMP-13               | Regulates catabolic<br>signaling pathways in<br>chondrocytes            | [15]      |
| <b>miR-221-3p</b>          | Articular cartilage | SDF1                 | Prevents degradation<br>ECM                                             | [16]      |

|                              |                     |                          |                                                                                              |          |
|------------------------------|---------------------|--------------------------|----------------------------------------------------------------------------------------------|----------|
| <b>miR-222</b>               | Articular cartilage | HDAC-4                   | Controls cartilage degradation via HDAC-mediated regulation of MMPs.                         | [17]     |
| <b>miR-27a</b>               | Synovium            | FSTL1                    | Prevents fibroblast migration and invasion                                                   | [18]     |
| <b>miR-27b</b>               | Articular cartilage | MMP-13                   | Anti-catabolic                                                                               | [19]     |
|                              | Articular cartilage | Leptin                   | Inhibits NF- $\kappa$ B signaling                                                            | [20]     |
| <b>miR-33</b>                | Articular cartilage | CCL2                     | Regulates monocyte chemotaxis                                                                | [21]     |
| <b>miR-130a</b>              | Articular cartilage | TNF- $\alpha$ (indirect) | Anti-inflammatory                                                                            | [22]     |
| <b>miR-193b</b>              | Articular cartilage | TGFB2, TGFB3<br>MMP-19   | Inhibits chondrogenesis, regulates early inflammation by repressing TNF- $\alpha$ expression | [23, 24] |
| <b>miR-602 &amp; miR-608</b> | Articular cartilage | SHH                      | Regulates chondrocyte development and hypertrophic differentiation                           | [25]     |
| <b>miR-148a</b>              | Articular cartilage | Col10A1, MMP13, ADAMTS-5 | Promotes hyaline cartilage production                                                        | [26]     |
| <b>miR-127-5p</b>            | Articular cartilage | MMP-13                   | Anti-catabolic                                                                               | [27]     |
| <b>miR-488</b>               | Articular cartilage | ZIP-8                    | Chondrocyte differentiation and cartilage development                                        | [28]     |
| <b>miR-558</b>               | Articular cartilage | COX-2                    | Anti-catabolic                                                                               | [29]     |
| <b>miR-149</b>               | Articular cartilage | TNF- $\alpha$            | Anti-inflammatory                                                                            | [30]     |
| <b>miR-125b</b>              | Articular cartilage | ADAMTS-4                 | Prevents aggrecan loss                                                                       | [31]     |

|                                |                     |                        |                                                                                               |          |
|--------------------------------|---------------------|------------------------|-----------------------------------------------------------------------------------------------|----------|
| <b>miR-15a</b>                 | Articular cartilage | ADAMTS-5               | Pro-anabolic                                                                                  | [32]     |
| <b>miR-92a-3p</b>              | Articular cartilage | ADAMTS-4,<br>ADAMTS-5  | Anti-catabolic                                                                                | [33]     |
|                                |                     | HDAC2                  | Increases collagen deposition                                                                 | [34]     |
| <b>miR-19a</b>                 | Articular cartilage | SOX9                   | Promotes chondrocyte viability and migration through NF-κB pathway                            | [35]     |
| <b>miR-199a-3p</b>             | Articular cartilage | COX-2                  | Anti-catabolic                                                                                | [36]     |
| <b>miR-370</b>                 | Articular cartilage | SHMT-2                 | Regulates apoptosis                                                                           | [37]     |
| <b>miR-373</b>                 | Articular cartilage | MECP-2<br>P2X7R        | Regulates apoptosis<br>Anti-inflammatory                                                      | [37, 38] |
| <b>miR-146 (late-stage OA)</b> | Articular cartilage | IRAK-1, TRAF6,<br>BCL2 | Mediates NF-κB signaling<br>Promotes autophagy by inhibiting Bcl-2                            | [39, 40] |
| <b>miR-142-3p</b>              | Articular cartilage | HMGB1                  | Anti-apoptotic, anti-inflammatory                                                             | [41]     |
| <b>miR-210</b>                 | Articular cartilage | DR6, HIF-3α            | Inhibits NF-κB pathway, anti-apoptotic, promotes chondrocyte proliferation and ECM deposition | [42, 43] |
| <b>miR-365</b>                 | Articular cartilage | HIF-2α                 | Prevents IL-1β-mediated ECM loss                                                              | [44]     |
| <b>miR-24</b>                  | Articular cartilage | P16 <sup>INK4A</sup>   | Regulates chondrocyte senescence                                                              | [45]     |
| <b>miR-17-5p</b>               | Articular cartilage | p62/SQSTM1             | Induces autophagy                                                                             | [46]     |
| <b>miR-155</b>                 | Synovium            | MMP-3, MMP-1           | Suppresses proliferation and invasion of synovial fibroblasts, anti-inflammatory              | [47]     |

|                   |                     |                |                                                          |                           |
|-------------------|---------------------|----------------|----------------------------------------------------------|---------------------------|
| <b>miR-98</b>     | Articular cartilage | Not identified | Anti-apoptotic                                           | [48]                      |
| <b>miR-188-5p</b> | Synovium            | DNMT           | Regulates canonical Wnt pathway, synovial proliferation  | decreases fibroblast [49] |
| <b>miR-152</b>    | Synovium            | DNMT           | Regulates canonical Wnt pathway, synovial proliferation  | decreases fibroblast [50] |
| <b>miR-451</b>    | Synovium            | P38-MAPK       | Reduces fibroblast proliferation and cytokine expression | synovial [51]             |
| <b>miR-29a</b>    | Synovium            | VEGF           | Protects excessive remodeling                            | against synovial [52]     |

Supplementary Table 2  
**MiRNAs involved in cartilage-destructive mechanisms**

| MicroRNA          | Tissue              | Target Gene                                   | Role of microRNA                                                                                | Reference        |
|-------------------|---------------------|-----------------------------------------------|-------------------------------------------------------------------------------------------------|------------------|
| <b>miR-381</b>    | Articular cartilage | MMP-13,<br>HDAC4<br><br>I $\kappa$ B $\alpha$ | Chondrocyte hypertrophy and cartilage degeneration                                              | [53, 54]<br>[55] |
| <b>miR-23a-3p</b> | Articular cartilage | SMAD3                                         | Inhibits ECM synthesis                                                                          | [56]             |
| <b>miR-216b</b>   | Articular cartilage | SMAD3                                         | Inhibits chondrocyte proliferation                                                              | [57]             |
| <b>miR-302b</b>   | Articular cartilage | SMAD3,<br>NOTCH2                              | Promotes inflammation                                                                           | [58]             |
| <b>miR-138-5p</b> | Articular cartilage | FOXC1                                         | Promotes cartilage degradation                                                                  | [59]             |
| <b>miR-139</b>    | Articular cartilage | EIF4G2,<br>MCPIP                              | Inhibits chondrocyte proliferation and migration, induces apoptosis (in association with miR-9) | [60, 61]         |
| <b>miR-365</b>    | Articular cartilage | HDAC4                                         | Mediates mechanical stress, pro-inflammatory                                                    | [62]             |
| <b>miR-101</b>    | Articular cartilage | SOX9                                          | Cartilage degradation                                                                           | [63, 64]         |
| <b>miR-145</b>    | Articular cartilage | SOX9, SMAD3                                   | Cartilage degradation                                                                           | [65, 66]         |
| <b>miR-15a-5p</b> | Articular cartilage | VEGFA                                         | Apoptosis, matrix degradation                                                                   | [67]             |

|                  |                     |                      |                                                                                        |          |
|------------------|---------------------|----------------------|----------------------------------------------------------------------------------------|----------|
| <b>miR-16-5p</b> | Articular cartilage | SMAD3                | Cartilage degradation                                                                  | [68]     |
| <b>miR-181</b>   | Articular cartilage | PTEN, GPD1L          | Inhibits chondrocyte proliferation and promotes apoptosis                              | [69, 70] |
| <b>miR-181b</b>  | Articular cartilage | Not identified       | Negatively regulates chondrocyte differentiation/cartilage development                 | [71]     |
| <b>miR-21</b>    | Articular cartilage | GDF-5                | Negatively regulates chondrogenesis                                                    | [72]     |
| <b>miR-146a</b>  | Articular cartilage | SMAD4                | Activator in early OA                                                                  | [73]     |
| <b>miR-98</b>    | Articular cartilage | BCL-2                | Promotes chondrocyte apoptosis                                                         | [74]     |
| <b>miR-9</b>     | Articular cartilage | MCPIP-1, PRTG, SIRT1 | Enhances IL-6 expression, negatively regulates chondrocyte survival/proliferation      | [75, 76] |
|                  |                     |                      | Mediates cell death induced by H <sub>2</sub> O <sub>2</sub>                           | [77]     |
| <b>miR-34a</b>   | Articular cartilage | SIRT1                | Apoptosis                                                                              | [78, 79] |
|                  |                     |                      | Expression increases in chondrocytes exposed to H <sub>2</sub> O <sub>2</sub>          | [80]     |
| <b>miR-4262</b>  | Articular cartilage | SIRT1                | Decreases cell viability, autophagy and matrix synthesis through PI3K/AKT/mTOR pathway | [81]     |
| <b>miR-449a</b>  | Articular cartilage | SIRT1                | Cartilage degradation                                                                  | [82]     |
| <b>miR-223</b>   | Articular cartilage | PEX-16               | Peroxisomal dysfunction (OA in patients with type 2 diabetes mellitus)                 | [83]     |

|                    |                     |                                                                      |                                                                                |                          |
|--------------------|---------------------|----------------------------------------------------------------------|--------------------------------------------------------------------------------|--------------------------|
| <b>miR-155</b>     | Articular cartilage | Autophagy-related genes (ATG3, GABARAPL1, ATG5, ATG2B, LAMP2, FOXO3) | Autophagy inhibition                                                           | [84]                     |
| <b>miR-30b</b>     | Articular cartilage | BECN1, ATG5                                                          | Autophagy inhibition, pro-apoptotic, ECM degradation                           | [85]                     |
| <b>miR-483-5p</b>  | Articular cartilage | Matn3, Timp2                                                         | Stimulates chondrocyte hypertrophy, ECM degradation and cartilage angiogenesis | [86]                     |
| <b>miR-181a-5p</b> | Facet cartilage     | ZNF440                                                               | Pro-inflammatory, pro-catabolic, cell death                                    | [87]                     |
| <b>miR-4454</b>    | Facet cartilage     | ZNF440                                                               | Pro-inflammatory, pro-catabolic, cell death                                    | [87]                     |
| <b>miR-221</b>     | Synovium            | Not identified                                                       | Pro-inflammatory, promotes cell migration and invasion                         | [88]                     |
| <b>miR-18a</b>     | Synovium            | TNFAIP3                                                              | Induces signaling, degradation, pro-inflammatory                               | NF-κB<br>ECM<br>[89, 90] |
| <b>miR-19b</b>     | Synovium            | Not identified                                                       | Induces signaling                                                              | NF-κB<br>[91, 92]        |
| <b>miR-203</b>     | Synovium            | Not identified                                                       | Increased MMP-1 and IL-6 via NF-κB pathway                                     | [93]                     |
| <b>miR-125b-5p</b> | Synovium            | SYVN1                                                                | Promotes apoptosis                                                             | [94]                     |

## References

1. Miyaki, S., et al., *MicroRNA-140 is expressed in differentiated human articular chondrocytes and modulates interleukin-1 responses*. *Arthritis Rheum*, 2009. **60**(9): p. 2723-30.
2. Araldi, E. and E. Schipani, *MicroRNA-140 and the silencing of osteoarthritis*. *Genes Dev*, 2010. **24**(11): p. 1075-80.
3. Tardif, G., et al., *Regulation of the IGFBP-5 and MMP-13 genes by the microRNAs miR-140 and miR-27a in human osteoarthritic chondrocytes*. *BMC Musculoskelet Disord*, 2009. **10**: p. 148.
4. Ji, Q., et al., *The IL-1beta/AP-1/miR-30a/ADAMTS-5 axis regulates cartilage matrix degradation in human osteoarthritis*. *J Mol Med (Berl)*, 2016. **94**(7): p. 771-85.
5. Gu, R., et al., *MicroRNA-9 regulates the development of knee osteoarthritis through the NF-kappaB1 pathway in chondrocytes*. *Medicine (Baltimore)*, 2016. **95**(36): p. e4315.
6. Zhang, H., B. Song, and Z. Pan, *Downregulation of microRNA-9 increases matrix metalloproteinase-13 expression levels and facilitates osteoarthritis onset*. *Mol Med Rep*, 2018. **17**(3): p. 3708-3714.
7. Zhang, G., et al., *MiR-502-5p inhibits IL-1beta-induced chondrocyte injury by targeting TRAF2*. *Cell Immunol*, 2016. **302**: p. 50-7.
8. Wang, G.D., et al., *Effects of miR-145 on the inhibition of chondrocyte proliferation and fibrosis by targeting TNFRSF11B in human osteoarthritis*. *Mol Med Rep*, 2017. **15**(1): p. 75-80.
9. Zhong, J.H., et al., *Effects of microRNA-146a on the proliferation and apoptosis of human osteoarthritis chondrocytes by targeting TRAF6 through the NF-kappaB signaling pathway*. *Biosci Rep*, 2017.
10. Rasheed, Z., et al., *MicroRNA-26a-5p regulates the expression of inducible nitric oxide synthase via activation of NF-kappaB pathway in human osteoarthritis chondrocytes*. *Arch Biochem Biophys*, 2016. **594**: p. 61-7.
11. Yin, X., J.Q. Wang, and S.Y. Yan, *Reduced miR26a and miR26b expression contributes to the pathogenesis of osteoarthritis via the promotion of p65 translocation*. *Mol Med Rep*, 2017. **15**(2): p. 551-558.
12. Ji, Q., et al., *miR-105/Runx2 axis mediates FGF2-induced ADAMTS expression in osteoarthritis cartilage*. *J Mol Med (Berl)*, 2016. **94**(6): p. 681-94.
13. Peng, H., et al., *MicroRNA-320a protects against osteoarthritis cartilage degeneration by regulating the expressions of BMI-1 and RUNX2 in chondrocytes*. *Pharmazie*, 2017. **72**(4): p. 223-226.
14. Meng, F., et al., *MicroRNA-320 regulates matrix metalloproteinase-13 expression in chondrogenesis and interleukin-1beta-induced chondrocyte responses*. *Osteoarthritis Cartilage*, 2016. **24**(5): p. 932-41.
15. Wang, G., et al., *MicroRNA-411 inhibited matrix metalloproteinase 13 expression in human chondrocytes*. *Am J Transl Res*, 2015. **7**(10): p. 2000-6.
16. Zheng, X., et al., *Downregulation of miR-221-3p contributes to IL-1beta-induced cartilage degradation by directly targeting the SDF1/CXCR4 signaling pathway*. *J Mol Med (Berl)*, 2017.
17. Song, J., et al., *MicroRNA-222 regulates MMP-13 via targeting HDAC-4 during osteoarthritis pathogenesis*. *BBA Clin*, 2015. **3**: p. 79-89.
18. Shi, D.L., et al., *MicroRNA-27a Inhibits Cell Migration and Invasion of Fibroblast-Like Synoviocytes by Targeting Follistatin-Like Protein 1 in Rheumatoid Arthritis*. *Mol Cells*, 2016. **39**(8): p. 611-8.
19. Akhtar, N., et al., *MicroRNA-27b regulates the expression of matrix metalloproteinase 13 in human osteoarthritis chondrocytes*. *Arthritis Rheum*, 2010. **62**(5): p. 1361-71.



20. Zhou, B., H. Li, and J. Shi, *miR27 inhibits the NF-kappaB signaling pathway by targeting leptin in osteoarthritic chondrocytes*. *Int J Mol Med*, 2017. **40**(2): p. 523-530.
21. Wei, M., et al., *MicroRNA-33 suppresses CCL2 expression in chondrocytes*. *Biosci Rep*, 2016. **36**(3).
22. Li, Z.C., et al., *Decreased expression of microRNA-130a correlates with TNF-alpha in the development of osteoarthritis*. *Int J Clin Exp Pathol*, 2015. **8**(3): p. 2555-64.
23. Hou, C., et al., *MiR-193b regulates early chondrogenesis by inhibiting the TGF-beta2 signaling pathway*. *FEBS Lett*, 2015. **589**(9): p. 1040-7.
24. Chang, Z.K., et al., *MicroRNA-193b-3p Regulates Matrix Metalloproteinase 19 Expression in Interleukin-1beta-Induced Human Chondrocytes*. *J Cell Biochem*, 2018.
25. Akhtar, N., M.S. Makki, and T.M. Haqqi, *MicroRNA-602 and microRNA-608 regulate sonic hedgehog expression via target sites in the coding region in human chondrocytes*. *Arthritis Rheumatol*, 2015. **67**(2): p. 423-34.
26. Vonk, L.A., et al., *Overexpression of hsa-miR-148a promotes cartilage production and inhibits cartilage degradation by osteoarthritic chondrocytes*. *Osteoarthritis Cartilage*, 2014. **22**(1): p. 145-53.
27. Park, S.J., et al., *MicroRNA-127-5p regulates matrix metalloproteinase 13 expression and interleukin-1beta-induced catabolic effects in human chondrocytes*. *Arthritis Rheum*, 2013. **65**(12): p. 3141-52.
28. Song, J., et al., *MicroRNA-488 regulates zinc transporter SLC39A8/ZIP8 during pathogenesis of osteoarthritis*. *J Biomed Sci*, 2013. **20**: p. 31.
29. Park, S.J., E.J. Cheon, and H.A. Kim, *MicroRNA-558 regulates the expression of cyclooxygenase-2 and IL-1beta-induced catabolic effects in human articular chondrocytes*. *Osteoarthritis Cartilage*, 2013. **21**(7): p. 981-9.
30. Santini, P., et al., *The inflammatory circuitry of miR-149 as a pathological mechanism in osteoarthritis*. *Rheumatol Int*, 2014. **34**(5): p. 711-6.
31. Matsukawa, T., et al., *MicroRNA-125b regulates the expression of aggrecanase-1 (ADAMTS-4) in human osteoarthritic chondrocytes*. *Arthritis Res Ther*, 2013. **15**(1): p. R28.
32. Lu, X., et al., *Hsa-miR-15a exerts protective effects against osteoarthritis by targeting aggrecanase-2 (ADAMTS5) in human chondrocytes*. *Int J Mol Med*, 2016. **37**(2): p. 509-16.
33. Mao, G., et al., *MicroRNA-92a-3p Regulates Aggrecanase-1 and Aggrecanase-2 Expression in Chondrogenesis and IL-1beta-Induced Catabolism in Human Articular Chondrocytes*. *Cell Physiol Biochem*, 2017. **44**(1): p. 38-52.
34. Mao, G., et al., *MicroRNA-92a-3p regulates the expression of cartilage-specific genes by directly targeting histone deacetylase 2 in chondrogenesis and degradation*. *Osteoarthritis Cartilage*, 2017. **25**(4): p. 521-532.
35. Yu, C. and Y. Wang, *MicroRNA-19a promotes cell viability and migration of chondrocytes via up-regulating SOX9 through NF-kappaB pathway*. *Biomed Pharmacother*, 2018. **98**: p. 746-753.
36. Akhtar, N. and T.M. Haqqi, *MicroRNA-199a\* regulates the expression of cyclooxygenase-2 in human chondrocytes*. *Ann Rheum Dis*, 2012. **71**(6): p. 1073-80.
37. Song, J., et al., *miR-370 and miR-373 regulate the pathogenesis of osteoarthritis by modulating one-carbon metabolism via SHMT-2 and MECP-2, respectively*. *Aging Cell*, 2015. **14**(5): p. 826-37.
38. Jin, R., et al., *Adipose-Derived Stem Cells Suppress Inflammation Induced by IL-1beta through Down-Regulation of P2X7R Mediated by miR-373 in Chondrocytes of Osteoarthritis*. *Mol Cells*, 2017. **40**(3): p. 222-229.
39. Zhang, F., et al., *MicroRNA-146a Induced by Hypoxia Promotes Chondrocyte Autophagy through Bcl-2*. *Cell Physiol Biochem*, 2015. **37**(4): p. 1442-53.

40. Chen, G., et al., *Hypoxia-induced microRNA-146a represses Bcl-2 through Traf6/IRAK1 but not Smad4 to promote chondrocyte autophagy*. Biol Chem, 2016.
41. Wang, X., et al., *MicroRNA-142-3p Inhibits Chondrocyte Apoptosis and Inflammation in Osteoarthritis by Targeting HMGB1*. 2016. **39**(5): p. 1718-28.
42. Zhang, D., et al., *MiR-210 inhibits NF-kappaB signaling pathway by targeting DR6 in osteoarthritis*. Sci Rep, 2015. **5**: p. 12775.
43. Li, Z., et al., *Overexpression of microRNA-210 promotes chondrocyte proliferation and extracellular matrix deposition by targeting HIF-3alpha in osteoarthritis*. Mol Med Rep, 2016. **13**(3): p. 2769-76.
44. Hwang, H.S., et al., *MicroRNA-365 regulates IL-1beta-induced catabolic factor expression by targeting HIF-2alpha in primary chondrocytes*. Sci Rep, 2017. **7**(1): p. 17889.
45. Philipot, D., et al., *p16INK4a and its regulator miR-24 link senescence and chondrocyte terminal differentiation-associated matrix remodeling in osteoarthritis*. Arthritis Res Ther, 2014. **16**(1): p. R58.
46. Li, H., et al., *MicroRNA-17-5p contributes to osteoarthritis progression by binding p62/SQSTM1*. Exp Ther Med, 2018. **15**(2): p. 1789-1794.
47. Long, L., et al., *Upregulated MicroRNA-155 Expression in Peripheral Blood Mononuclear Cells and Fibroblast-Like Synoviocytes in Rheumatoid Arthritis*. Clinical and Developmental Immunology, 2013. **2013**: p. 296139.
48. Wang, G.L., et al., *Upregulation of miR-98 Inhibits Apoptosis in Cartilage Cells in Osteoarthritis*. Genet Test Mol Biomarkers, 2016. **20**(11): p. 645-653.
49. Ruedel, A., et al., *Expression and function of microRNA-188-5p in activated rheumatoid arthritis synovial fibroblasts*. Int J Clin Exp Pathol, 2015. **8**(5): p. 4953-62.
50. Miao, C.G., et al., *MicroRNA-152 modulates the canonical Wnt pathway activation by targeting DNA methyltransferase 1 in arthritic rat model*. Biochimie, 2014. **106**: p. 149-56.
51. Wang, Z.-C., et al., *MiR-451 inhibits synovial fibroblasts proliferation and inflammatory cytokines secretion in rheumatoid arthritis through mediating p38MAPK signaling pathway*. International Journal of Clinical and Experimental Pathology, 2015. **8**(11): p. 14562-14567.
52. Ko, J.Y., et al., *MicroRNA-29a Counteracts Synovitis in Knee Osteoarthritis Pathogenesis by Targeting VEGF*. Sci Rep, 2017. **7**(1): p. 3584.
53. Chen, W., et al., *MicroRNA-381 Regulates Chondrocyte Hypertrophy by Inhibiting Histone Deacetylase 4 Expression*. Int J Mol Sci, 2016. **17**(9).
54. Hou, C., et al., *The Role of MicroRNA-381 in Chondrogenesis and Interleukin-1-beta Induced Chondrocyte Responses*. Cell Physiol Biochem, 2015. **36**(5): p. 1753-66.
55. Xia, S., K. Yan, and Y. Wang, *Increased miR-381a-3p Contributes to Osteoarthritis by Targeting IkbAlpha*. Ann Clin Lab Sci, 2016. **46**(3): p. 247-53.
56. Kang, L., et al., *MicroRNA-23a-3p promotes the development of osteoarthritis by directly targeting SMAD3 in chondrocytes*. Biochem Biophys Res Commun, 2016. **478**(1): p. 467-73.
57. He, J., J. Zhang, and D. Wang, *Down-regulation of microRNA-216binhibits IL-1beta-induced chondrocyte injury by up-regulation of Smad3*. Biosci Rep, 2017.
58. Wang, Y., et al., *Knockdown MiR-302b Alleviates LPS-Induced Injury by Targeting Smad3 in C28/I2 Chondrocytic Cells*. Cell Physiol Biochem, 2018. **45**(2): p. 733-743.
59. Yuan, Y., et al., *Silencing of microRNA-138-5p promotes IL-1beta-induced cartilage degradation in human chondrocytes by targeting FOXC1: miR-138 promotes cartilage degradation*. Bone Joint Res, 2016. **5**(10): p. 523-530.
60. Hu, W., et al., *miR-139 is up-regulated in osteoarthritis and inhibits chondrocyte proliferation and migration possibly via suppressing EIF4G2 and IGF1R*. Biochem Biophys Res Commun, 2016. **474**(2): p. 296-302.

61. Makki, M.S. and T.M. Haqqi, *miR-139 modulates MCP1P1/IL-6 expression and induces apoptosis in human OA chondrocytes*. *Exp Mol Med*, 2015. **47**: p. e189.
62. Yang, X., et al., *Mechanical and IL-1beta Responsive miR-365 Contributes to Osteoarthritis Development by Targeting Histone Deacetylase 4*. *Int J Mol Sci*, 2016. **17**(4): p. 436.
63. Dai, L., et al., *Silencing of microRNA-101 prevents IL-1beta-induced extracellular matrix degradation in chondrocytes*. *Arthritis Res Ther*, 2012. **14**(6): p. R268.
64. Dai, L., et al., *Silencing of miR-101 Prevents Cartilage Degradation by Regulating Extracellular Matrix-related Genes in a Rat Model of Osteoarthritis*. *Mol Ther*, 2015. **23**(8): p. 1331-40.
65. Yang, B., et al., *Effect of microRNA-145 on IL-1beta-induced cartilage degradation in human chondrocytes*. *FEBS Lett*, 2014. **588**(14): p. 2344-52.
66. Martinez-Sanchez, A., K.A. Dudek, and C.L. Murphy, *Regulation of human chondrocyte function through direct inhibition of cartilage master regulator SOX9 by microRNA-145 (miRNA-145)*. *J Biol Chem*, 2012. **287**(2): p. 916-24.
67. Chen, H. and Y. Tian, *MiR-15a-5p regulates viability and matrix degradation of human osteoarthritis chondrocytes via targeting VEGFA*. *Biosci Trends*, 2017. **10**(6): p. 482-488.
68. Li, L., et al., *MicroRNA-16-5p Controls Development of Osteoarthritis by Targeting SMAD3 in Chondrocytes*. *Curr Pharm Des*, 2015. **21**(35): p. 5160-7.
69. Wu, X.F., Z.H. Zhou, and J. Zou, *MicroRNA-181 inhibits proliferation and promotes apoptosis of chondrocytes in osteoarthritis by targeting PTEN*. *Biochem Cell Biol*, 2017.
70. Zhai, X., et al., *miR-181a Modulates Chondrocyte Apoptosis by Targeting Glycerol-3-Phosphate Dehydrogenase 1-Like Protein (GPD1L) in Osteoarthritis*. *Med Sci Monit*, 2017. **23**: p. 1224-1231.
71. Song, J., et al., *MicroRNA-181b regulates articular chondrocytes differentiation and cartilage integrity*. *Biochem Biophys Res Commun*, 2013. **431**(2): p. 210-4.
72. Zhang, Y., et al., *MicroRNA-21 controls the development of osteoarthritis by targeting GDF-5 in chondrocytes*. *Exp Mol Med*, 2014. **46**: p. e79.
73. Yamasaki, K., et al., *Expression of MicroRNA-146a in osteoarthritis cartilage*. *Arthritis Rheum*, 2009. **60**(4): p. 1035-41.
74. Wang, J., et al., *MiR-98 promotes chondrocyte apoptosis by decreasing Bcl-2 expression in a rat model of osteoarthritis*. *Acta Biochim Biophys Sin (Shanghai)*, 2016.
75. Makki, M.S., A. Haseeb, and T.M. Haqqi, *MicroRNA-9 promotion of interleukin-6 expression by inhibiting monocyte chemoattractant protein-induced protein 1 expression in interleukin-1beta-stimulated human chondrocytes*. *Arthritis Rheumatol*, 2015. **67**(8): p. 2117-28.
76. Song, J., et al., *MicroRNA-9 regulates survival of chondroblasts and cartilage integrity by targeting protogenin*. *Cell Commun Signal*, 2013. **11**: p. 66.
77. D'Adamo, S., et al., *Hydroxytyrosol modulates the levels of microRNA-9 and its target sirtuin-1 thereby counteracting oxidative stress-induced chondrocyte death*. *Osteoarthritis Cartilage*, 2017. **25**(4): p. 600-610.
78. Abouheif, M.M., et al., *Silencing microRNA-34a inhibits chondrocyte apoptosis in a rat osteoarthritis model in vitro*. *Rheumatology (Oxford)*, 2010. **49**(11): p. 2054-60.
79. Yan, S., et al., *MicroRNA-34a affects chondrocyte apoptosis and proliferation by targeting the SIRT1/p53 signaling pathway during the pathogenesis of osteoarthritis*. *Int J Mol Med*, 2016. **38**(1): p. 201-9.
80. Cheleschi, S., De Palma, S, Antonio Pascarelli, N, Giordano, N, Galeazzi, M, Tenti, S, Fioravanti, A, *Could Oxidative Stress Regulate the Expression of MicroRNA-146a and MicroRNA-34a in Human Osteoarthritic Chondrocyte Cultures?* *Int J Mol Sci*, 2017. **18**(12).
81. Sun, W., Y. Li, and S. Wei, *miR-4262 regulates chondrocyte viability, apoptosis, autophagy by targeting SIRT1 and activating PI3K/AKT/mTOR signaling pathway in rats with osteoarthritis*. *Exp Ther Med*, 2018. **15**(1): p. 1119-1128.

82. Park, K.W., et al., *Inhibition of microRNA-449a prevents IL-1beta-induced cartilage destruction via SIRT1*. Osteoarthritis Cartilage, 2016. **24**(12): p. 2153-2161.
83. Kim, D., et al., *Peroxisomal dysfunction is associated with up-regulation of apoptotic cell death via miR-223 induction in knee osteoarthritis patients with type 2 diabetes mellitus*. Bone, 2014. **64**: p. 124-31.
84. D'Adamo, S., et al., *MicroRNA-155 suppresses autophagy in chondrocytes by modulating expression of autophagy proteins*. Osteoarthritis Cartilage, 2016. **24**(6): p. 1082-91.
85. Chen, Z., T. Jin, and Y. Lu, *AntimiR-30b Inhibits TNF-alpha Mediated Apoptosis and Attenuated Cartilage Degradation through Enhancing Autophagy*. Cell Physiol Biochem, 2016. **40**(5): p. 883-894.
86. Wang, H., et al., *Intra-articular Delivery of Antago-miR-483-5p Inhibits Osteoarthritis by Modulating Matrilin 3 and Tissue Inhibitor of Metalloproteinase 2*. Mol Ther, 2017. **25**(3): p. 715-727.
87. Nakamura, A., et al., *Identification of microRNA-181a-5p and microRNA-4454 as mediators of facet cartilage degeneration*. JCI Insight. **1**(12).
88. Yang, S. and Y. Yang, *Downregulation of microRNA221 decreases migration and invasion in fibroblastlike synoviocytes in rheumatoid arthritis*. Mol Med Rep, 2015. **12**(2): p. 2395-401.
89. Trenkmann, M., et al., *Tumor necrosis factor alpha-induced microRNA-18a activates rheumatoid arthritis synovial fibroblasts through a feedback loop in NF-kappaB signaling*. Arthritis Rheum, 2013. **65**(4): p. 916-27.
90. Hu, P., et al., *Microarray based analysis of gene regulation by microRNA in intervertebral disc degeneration*. Molecular Medicine Reports, 2015. **12**(4): p. 4925-4930.
91. Gantier, M.P., et al., *A miR-19 regulon that controls NF-kappaB signaling*. Nucleic Acids Res, 2012. **40**(16): p. 8048-58.
92. Yan, N., et al., *Lumbar Disc Degeneration is Facilitated by MiR-100-Mediated FGFR3 Suppression*. Cell Physiol Biochem, 2015. **36**(6): p. 2229-36.
93. Stanczyk, J., et al., *Altered expression of microRNA-203 in rheumatoid arthritis synovial fibroblasts and its role in fibroblast activation*. Arthritis Rheum, 2011. **63**(2): p. 373-81.
94. Ge, F.X., H. Li, and X. Yin, *Upregulation of microRNA-125b-5p is involved in the pathogenesis of osteoarthritis by downregulating SYVN1*. Oncol Rep, 2017. **37**(4): p. 2490-2496.
